# Supplementary material
Source: Springer Nature journal article supplement (https://www.springermedizin.de/resource/supplementary/12985_2010_920_MOESM5_ESM.pdf/9608746)

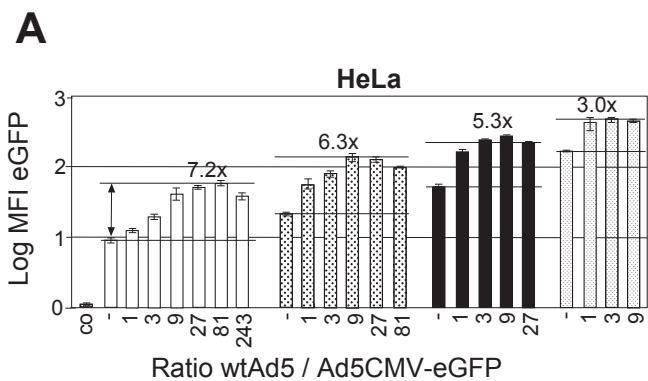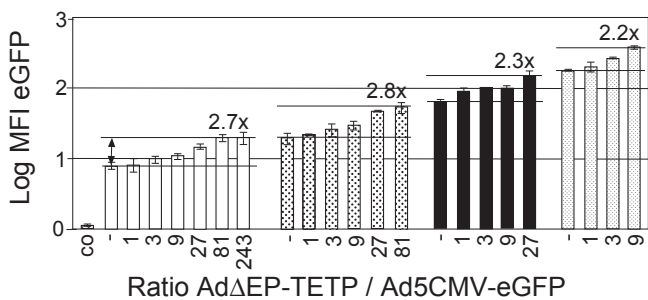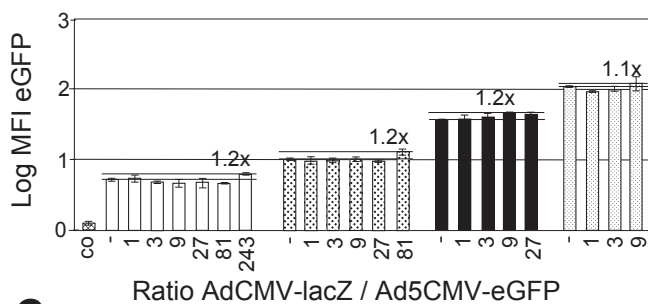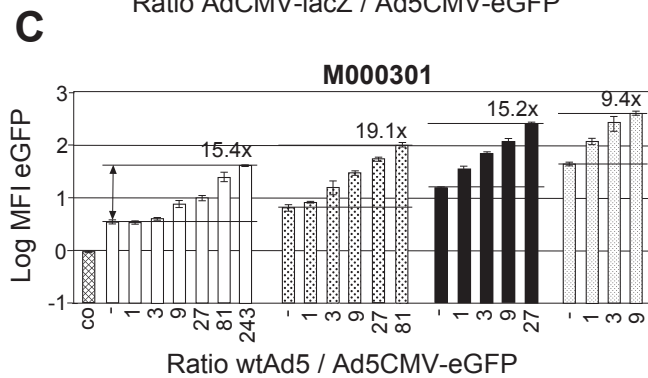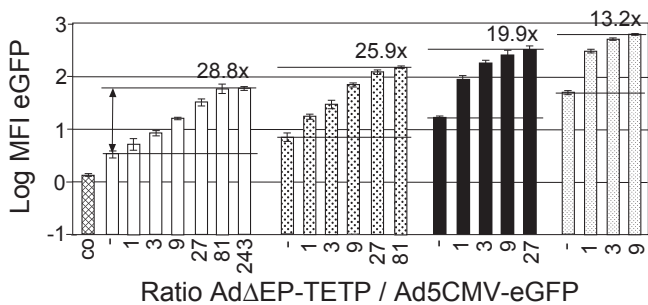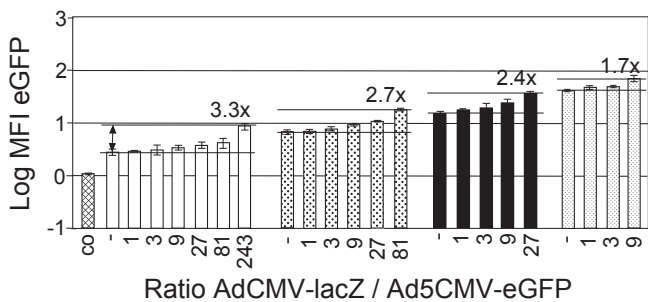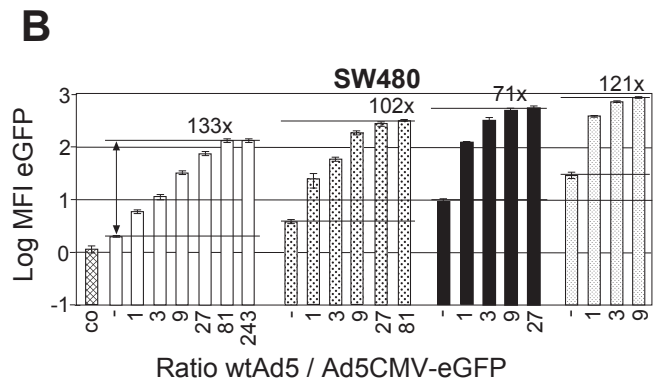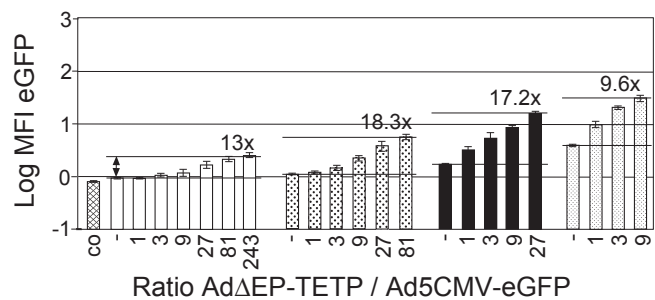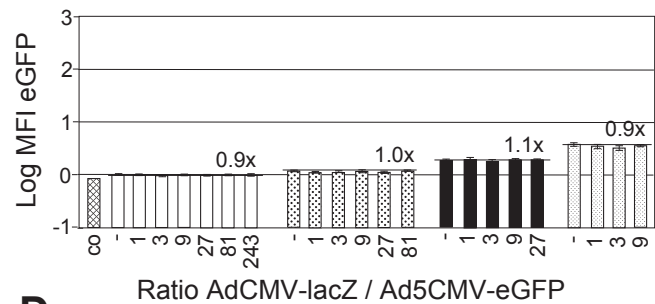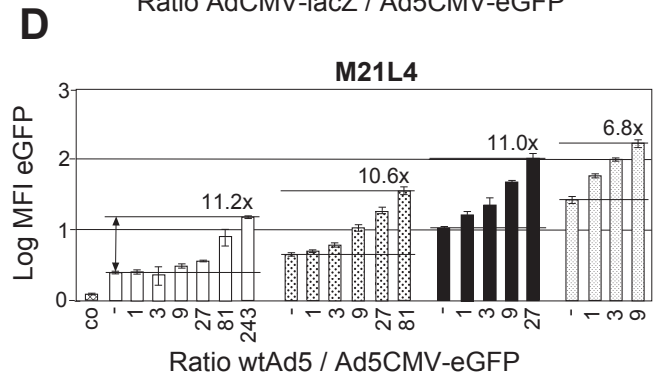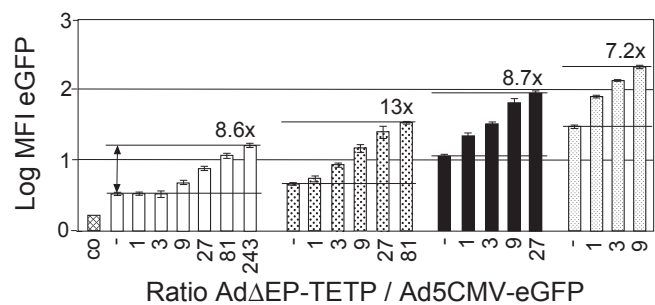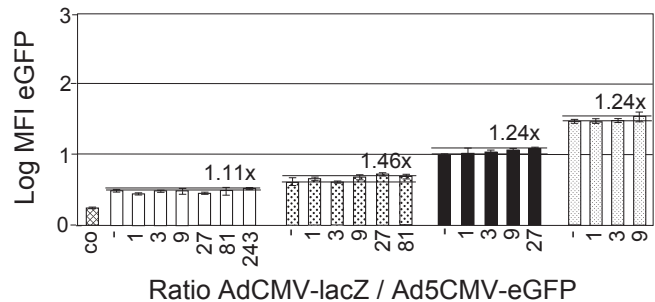

MOI AdCMV-eGFP  
 □ 0.37 ▣ 1.1 ■ 3.3 ▤ 10

Supplement: MOESM5 [file 9608746]
